# Supplementary material
Source: publisher figshare collection journal article supplement (https://acs.figshare.com/ndownloader/files/3597039)
Supplement: Supplementary file 1 [file 3597039]

## **Supporting Information:**

### **Potential-Dependent Hysteresis of Ion Density and Structure of Ionic Liquid at Gold Electrode Interface: In Situ Observation by Surface-Enhanced Infrared Absorption Spectroscopy**

**Kenta Motobayashi\*†, Kazuya Minami‡, Naoya Nishi‡, Tetsuo Sakka‡, and  
Masatoshi Osawa\*†**

*†Catalysis Research Center, Hokkaido University, Sapporo 001-0021, Japan*

*‡Department of Energy and Hydrocarbon Chemistry, Graduate School of Engineering,  
Kyoto University, Kyoto 615-8510, Japan*

Table t1. Vibrational frequencies ( $\text{cm}^{-1}$ ) and assignments of [BMIM][TFSA].

| SEIRAS | IR transmission | Calculation       | Assignment                                                       | Band intensity     |
|--------|-----------------|-------------------|------------------------------------------------------------------|--------------------|
| 3171   | 3157            | 3178 <sup>a</sup> | $\nu_s(\text{C}(4)\text{HC}(5)\text{H})_{\text{ring}}$           | $I_{\text{ring}}$  |
| 3120   | 3123            | 3122 <sup>a</sup> | $\nu_{\text{as}}(\text{C}(4)\text{HC}(5)\text{H})_{\text{ring}}$ | $I_{\text{ring}}$  |
| 3105   | 3105            | 3122 <sup>a</sup> | $\nu(\text{C}(2)\text{H})_{\text{ring}}$                         | $I_{\text{ring}}$  |
| 2959   | 2969            | 2957 <sup>a</sup> | $\nu_{\text{as}}(\text{CH}_3)_{\text{alkyl}}$                    | $I_{\text{alkyl}}$ |
| 2934   | 2941            | 2939 <sup>a</sup> | $\nu_{\text{as}}(\text{CH}_2)_{\text{alkyl}}$                    | $I_{\text{alkyl}}$ |
| 2874   | 2882            | 2874 <sup>a</sup> | $\nu_s(\text{CH}_3)_{\text{alkyl}}$                              | $I_{\text{alkyl}}$ |
| 2863   | 2870            | 2874 <sup>a</sup> | $\nu_s(\text{CH}_2)_{\text{alkyl}}$                              | $I_{\text{alkyl}}$ |
| 1357   | 1355            | 1323 <sup>b</sup> | $\nu_{\text{as}}(\text{SO}_2)$                                   | $I_{\text{SO}}$    |
| 1327   | 1332            | 1300 <sup>b</sup> | $\nu_{\text{as}}(\text{SO}_2)$                                   | $I_{\text{SO}}$    |
| 1238   | 1230            | 1234 <sup>b</sup> | $\nu_s(\text{CF}_3)$                                             | $I_{\text{CF}}$    |
| 1221   | 1203            | 1205 <sup>b</sup> | $\nu_{\text{as}}(\text{CF}_3)$                                   | $I_{\text{CF}}$    |
| 1134   | 1140            | 1112 <sup>b</sup> | $\nu_s(\text{SO}_2)$                                             | -                  |
| 1060   | 1059            | 999 <sup>b</sup>  | $\nu_{\text{as}}(\text{SNS})$                                    | -                  |

$\nu$ : stretching, s: symmetric; as: asymmetric; and C(2), C(4) and C(5): indicated below.

a: Katsyuba, S. A.; Zvereva, E. E.; Vidis, A.; Dyson, P. J. *J. Phys. Chem. A* **2006**, *111*, 352.

b: Herstedt, M.; Smirnov, M.; Johansson, P.; Chami, M.; Grondin, J.; Servant, L.; Lassègues, J. C. *J. Raman Spectrosc.* **2005**, *36*, 762.

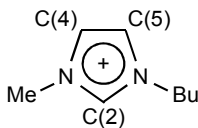

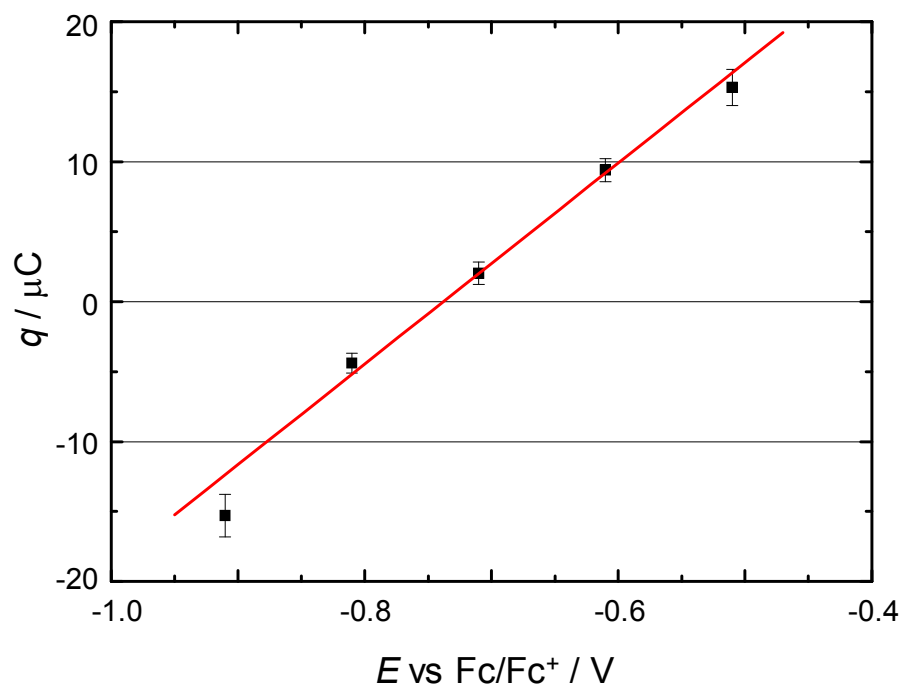

Figure s1. The measured charge as a function of electrode potential for the gold electrode in [BMIM][TFSA] in vacuum condition ( $5 \times 10^{-4}$  Pa). The charge of the electrode,  $q$ , was obtained by integrating the measured current flowing for a minute after dipping. This procedure was performed for 10 times, and the averaged value is plotted for each potential. Red line is an approximated line of  $q(E)$  which is obtained by least square fitting. The potential of zero charge is derived as -0.68 V from the intercept of  $q = 0$  and  $q(E)$ . Clean gold wires were used as the working electrode. A platinum mesh was used as a counter electrode. The reference electrode consisted of a silver electrode immersed in [BMIM][TFSA] saturated with  $\text{AgCF}_3\text{SO}_3$ , which was separated from the analyte with a Vycor glass filter.

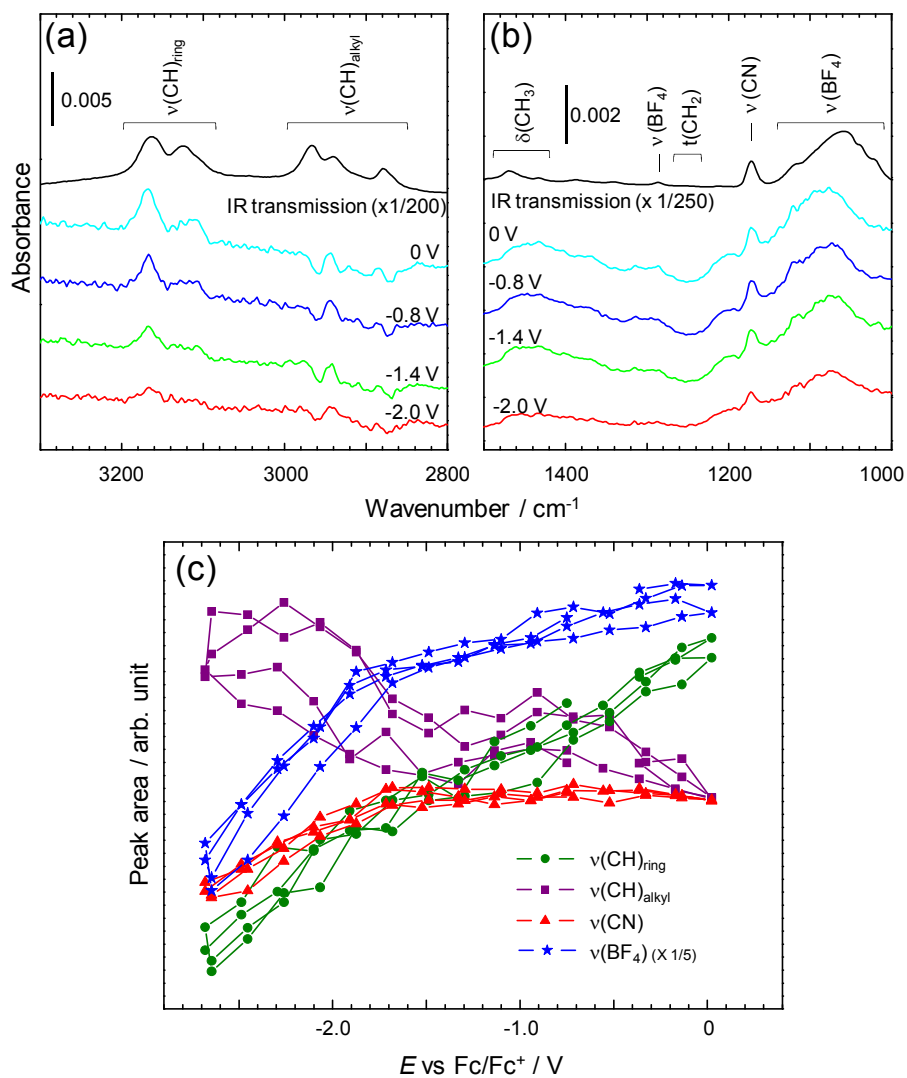

Figure S2. (a) and (b) SEIRA spectra of [BMIM][BF<sub>4</sub>]/Au recorded at various electrode potentials during positive potential scan at 40 mV/s. The reference spectrum was collected at -2.6 V vs Fc/Fc<sup>+</sup>. All the experimental procedure is identical to that of [BMIM][TFSA]/Au. (c) SEIRAS band intensities as a function of electrode potential. The results of two cycles of potential scans (40 mV/s) which start and end at -0.5 V are shown.
